# Supplementary material for: Facile extraction of cellulose nanocrystals from wood using ethanol and peroxide solvothermal pretreatment followed by ultrasonic nanofibrillation
Source: Royal Society of Chemistry journal article supplement (doi:10.1039/c5gc02576a), 2015-11-03
Supplement: c5gc02576a1.pdf [file c5gc02576a1.pdf]

## Supporting Information

### **Facile extraction of cellulose nanocrystals from wood using ethanol and peroxide solvothermal pretreatment followed by ultrasonic nanofibrillation**

Yanna Li, Yongzhuang Liu, Wenshuai Chen, Qingwen Wang, Yixing Liu, Jian Li, Haipeng Yu\*

*Key laboratory of Bio-based Material Science and Technology, Ministry of Education, Northeast Forestry University, Harbin 150040, China.*

Table S1 Assignment of main  $^{13}\text{C}$ - $^1\text{H}$  cross-signals in the HSQC spectra

| label                          | $\delta\text{C}/\delta\text{H}$ | assignment                                                                                                                               |
|--------------------------------|---------------------------------|------------------------------------------------------------------------------------------------------------------------------------------|
| $\text{C}_\beta$               | 52.1/3.71                       | $\text{C}_\beta\text{-H}_\beta$ in phenylcoumarane substructures (C)                                                                     |
| $\text{B}_\beta$               | 54.0/3.03                       | $\text{C}_\beta\text{-H}_\beta$ in resinol substructures (B)                                                                             |
| $-\text{OCH}_3$                | 56.1/3.77                       | C-H in methoxyls                                                                                                                         |
| $\text{D}_\beta$               | 60.7/3.18                       | $\text{C}_\beta\text{-H}_\beta$ in spirodienone substructures (D)                                                                        |
| $\text{A}_\gamma$              | 60.0/3.69 and 60.5/3.83         | $\text{C}_\gamma\text{-H}_\gamma$ in $\beta\text{-O-4'}$ substructures (A)                                                               |
| $\text{I}_\gamma$              | 62.3/4.22                       | $\text{C}_\gamma\text{-H}_\gamma$ in <i>p</i> -hydroxycinnamyl alcohol end groups (I)                                                    |
| $\text{C}_\gamma$              | 62.8/3.74                       | $\text{C}_\gamma\text{-H}_\gamma$ in phenylcoumaran substructures (C)                                                                    |
| $\text{B}_\gamma$              | 71.9/3.79 and 71.9/3.87         | $\text{C}_\gamma\text{-H}_\gamma$ in resinol substructures (B)                                                                           |
| $(\text{A}, \text{A}')_\alpha$ | 72.6/4.79                       | $\text{C}_\alpha\text{-H}_\alpha$ in $\beta\text{-O-4'}$ substructures (A) and $\gamma$ -acylated $\beta\text{-O-4'}$ substructures (A') |
| $\text{B}_\alpha$              | 85.7/4.64                       | $\text{C}_\alpha\text{-H}_\alpha$ in resinol substructures (B)                                                                           |
| $\text{S}_{2,6}$               | 103.8/6.64                      | $\text{C}_{2,6}\text{-H}_{2,6}$ in etherified syringyl units (S)                                                                         |
| $\text{S}'_{2,6}$              | 106.7/7.34                      | $\text{C}_{2,6}\text{-H}_{2,6}$ in oxidized ( $\text{C}_\alpha=\text{O}$ ) syringyl units (S')                                           |
| $\text{G}_2$                   | 111.7/6.97                      | $\text{C}_2\text{-H}_2$ in guaiacyl units (G)                                                                                            |
| $\text{G}_5$                   | 115.4/6.69 and<br>115.9/6.78    | $\text{C}_5\text{-H}_5$ in guaiacyl units (G)                                                                                            |
| $\text{G}_6$                   | 119.9/6.79                      | $\text{C}_6\text{-H}_6$ in guaiacyl units (G)                                                                                            |
| $\text{PB}_{2,6}$              | 131.5/7.67                      | $\text{C}_{2,6}\text{-H}_{2,6}$ in <i>p</i> -hydroxybenzoate substructures (PB)                                                          |

Table S2 Assignment of the association carbohydrate  $^{13}\text{C}$ - $^1\text{H}$  cross-signals in the HSQC spectra

| label            | $\delta\text{C}/\delta\text{H}$ | assignment                                                 |
|------------------|---------------------------------|------------------------------------------------------------|
| $\text{X}_2$     | 70.6/3.03                       | $\text{C}_2\text{-H}_2$ in $\beta\text{-D-xylopyranoside}$ |
| $\text{X}_3$     | 74.2/3.24                       | $\text{C}_3\text{-H}_3$ in $\beta\text{-D-xylopyranoside}$ |
| $\text{X}_4$     | 75.0/3.74                       | $\text{C}_4\text{-H}_4$ in $\beta\text{-D-xylopyranoside}$ |
| $\text{X}_{3_1}$ | 101.4/4.20                      | 3- <i>O</i> -acetyl- $\beta\text{-D-xylopyranoside}$       |

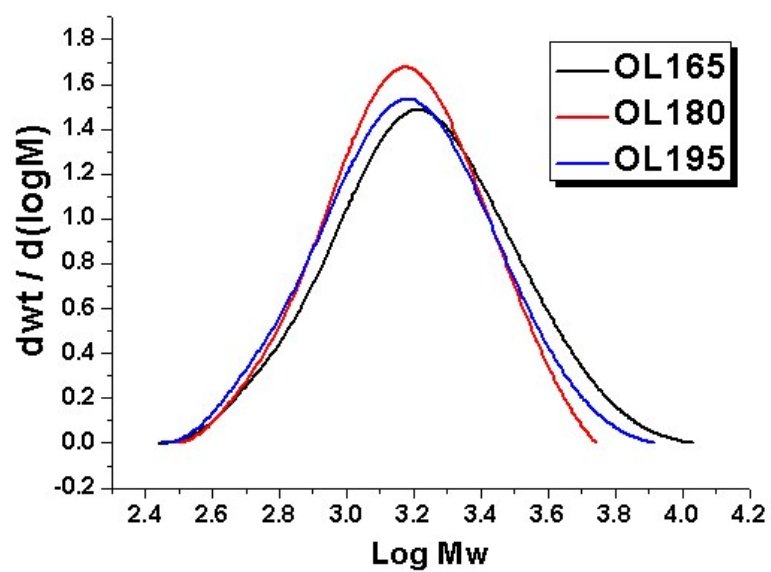

Figure S1 GPC curves of the lignin fractions.

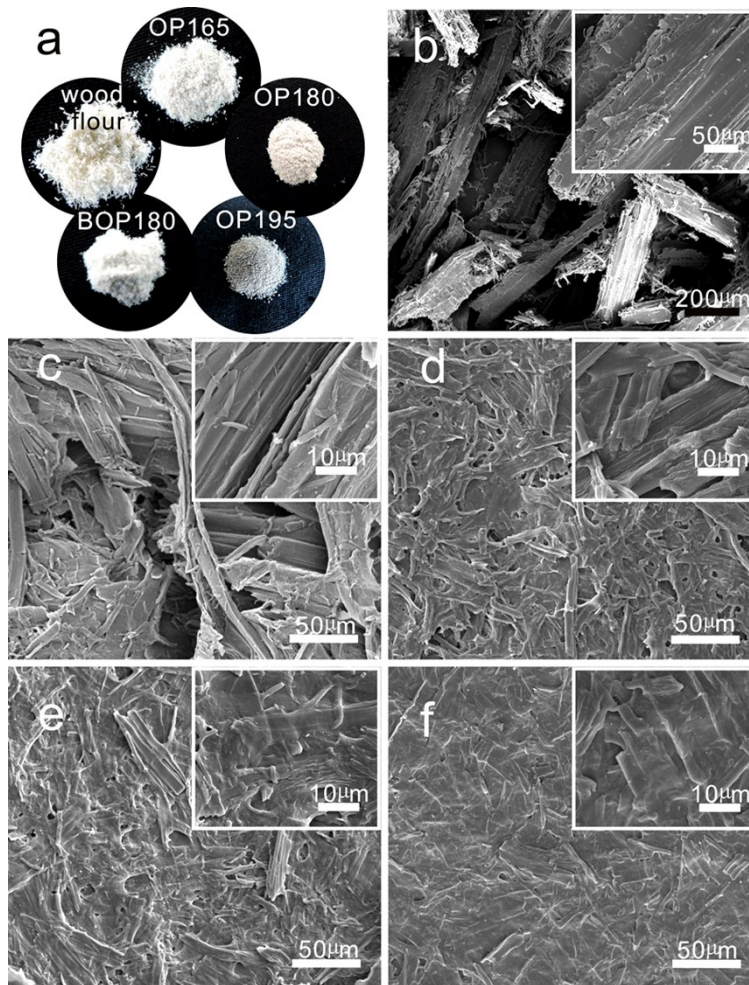

Figure S2 (a) Photographs of raw wood feedstock and the pretreated samples. SEM images of (b) wood flour, (c) OP165, (d) OP180, (e) OP195 and (f) BOP180.

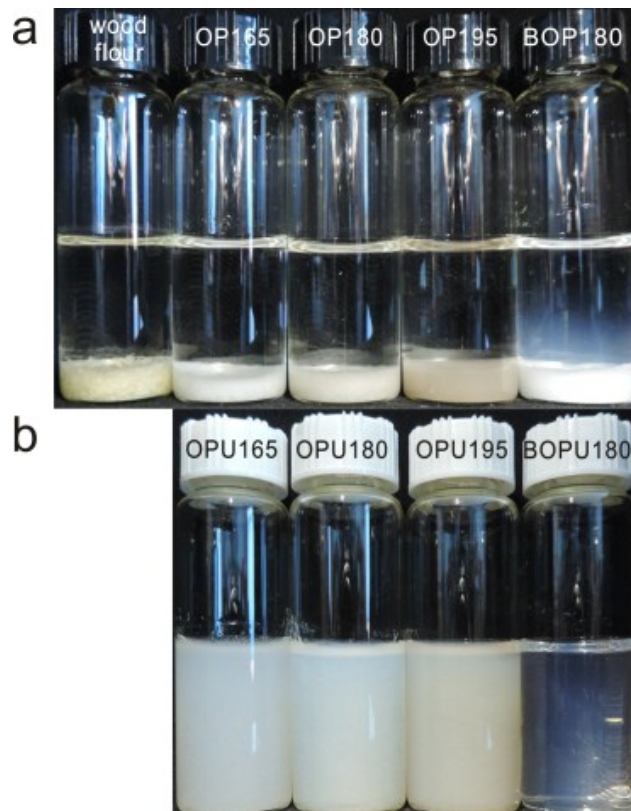

Figure S3 Sedimentation observation of (a) wood flour and the pretreated samples, and (b) the CNC suspensions. The photograph was taken after the samples had been placed for six months.

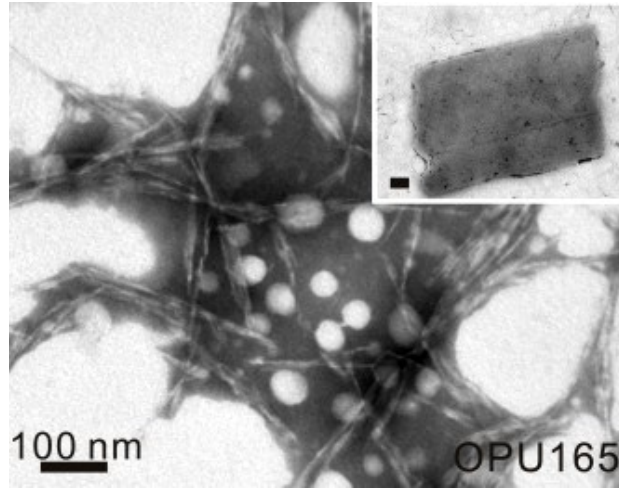

Figure S4 TEM image of OPU165 CNCs, and the inset shows the non-disintegrated cytoderm fragment.

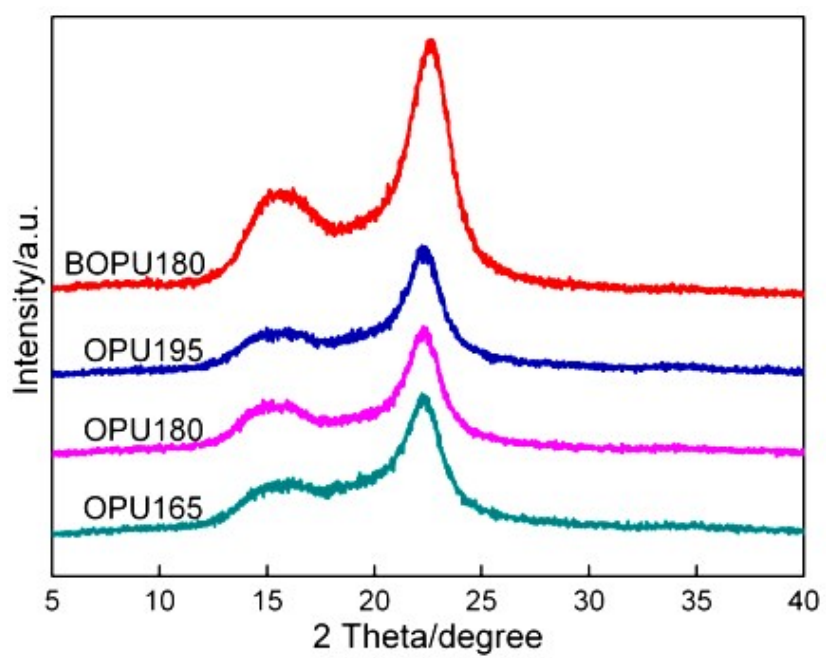

Figure S5 XRD patterns of OPU samples and BOPU180



CNC-based aerogels were obtained by freeze-drying the CNC suspensions. The SEM images in Fig. S6 demonstrate that the aerogels were composed of massive membranes, which were formed through the mutual aggregation of CNCs. Micrometer-sized pores were enclosed by the membranes, whereas mesopores could be identified on the membrane surfaces.

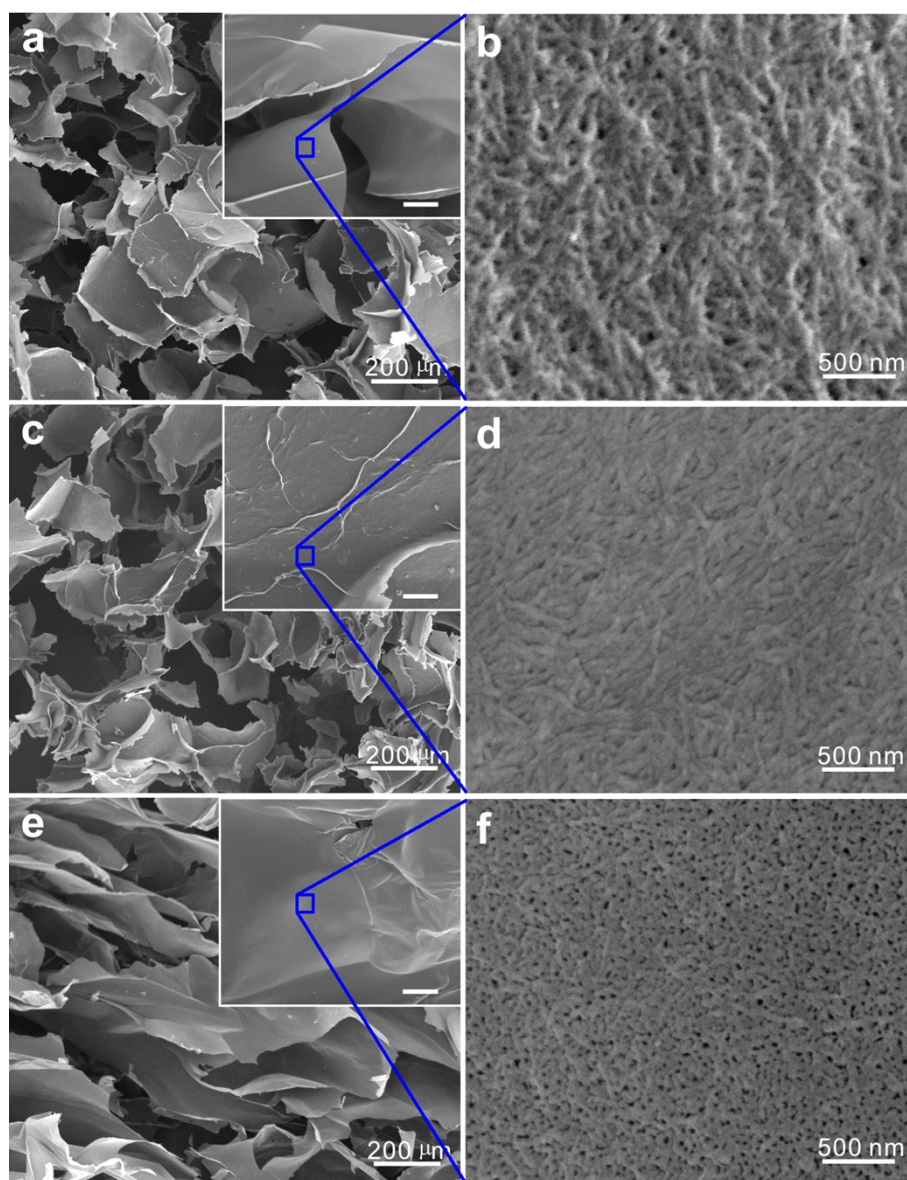

Figure S6 SEM images of the aerogels constituted by: (a-b) OPU180, (c-d) OPU195, and (e-f) BOPU180 CNCs. The scale bar in the insets corresponds to 20  $\mu\text{m}$ .
